# Supplementary figures and images for: AGER-1 Long Non-Coding RNA Levels Correlate with the Expression of the Advanced Glycosylation End-Product Receptor, a Regulator of the Inflammatory Response in Visceral Adipose Tissue of Women with Obesity and Type 2 Diabetes Mellitus
Source: MDPI journal article supplement (doi:10.3390/ijms242417447), 2023-12-13

Supplementary Figure S1

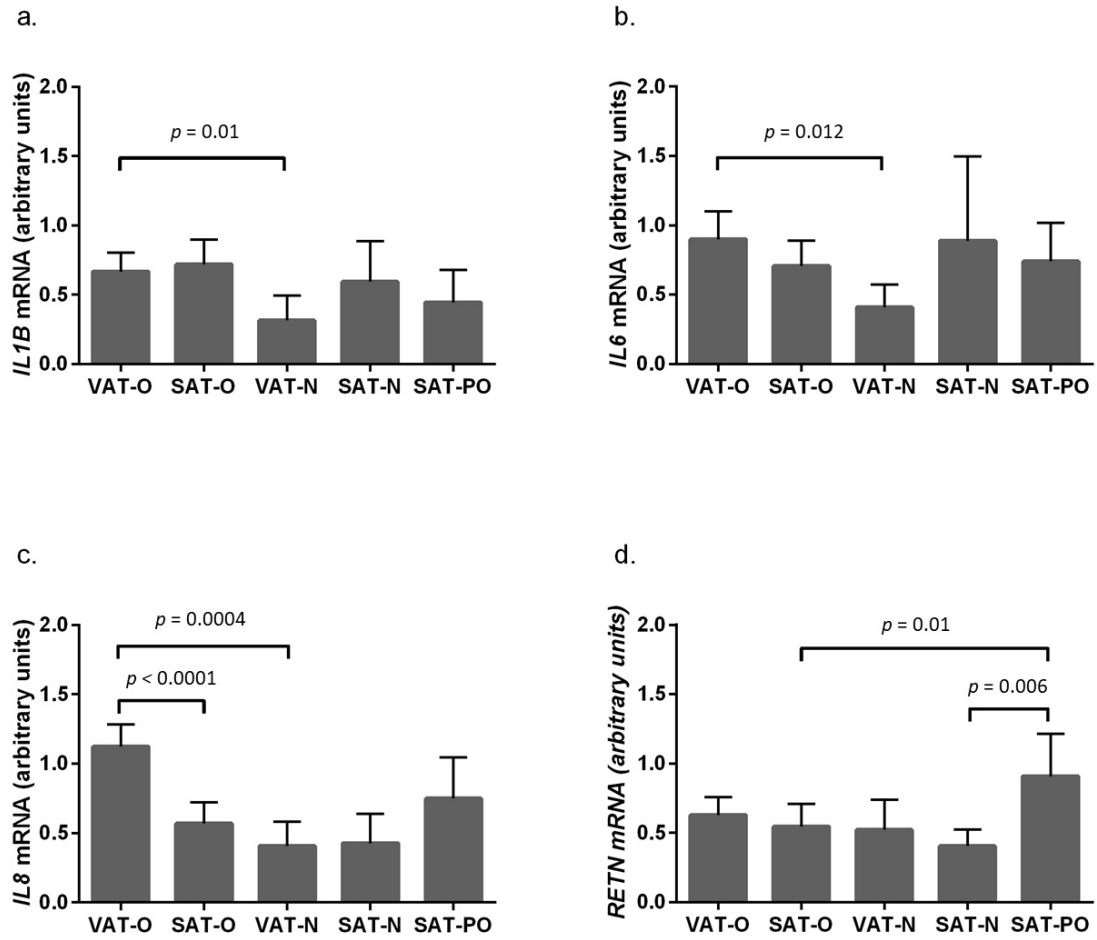

Supplementary Figure S2

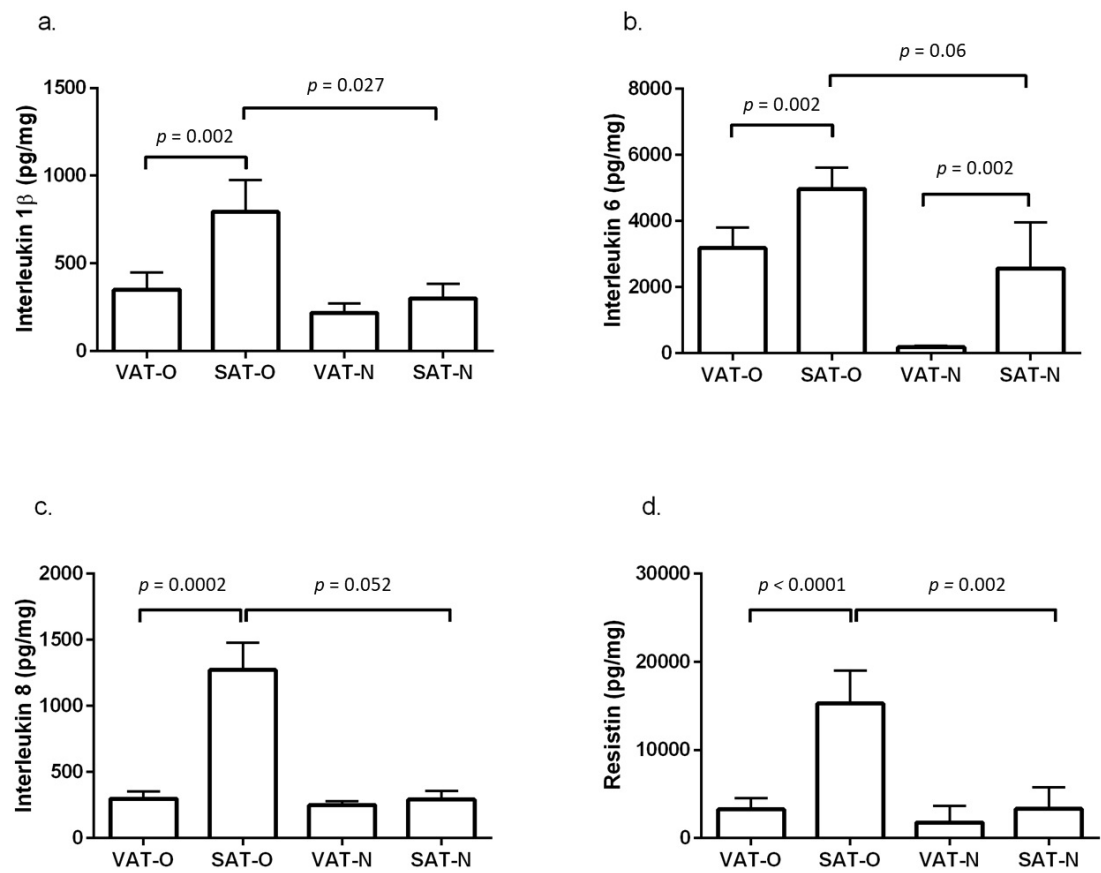

Supplementary Figure S3

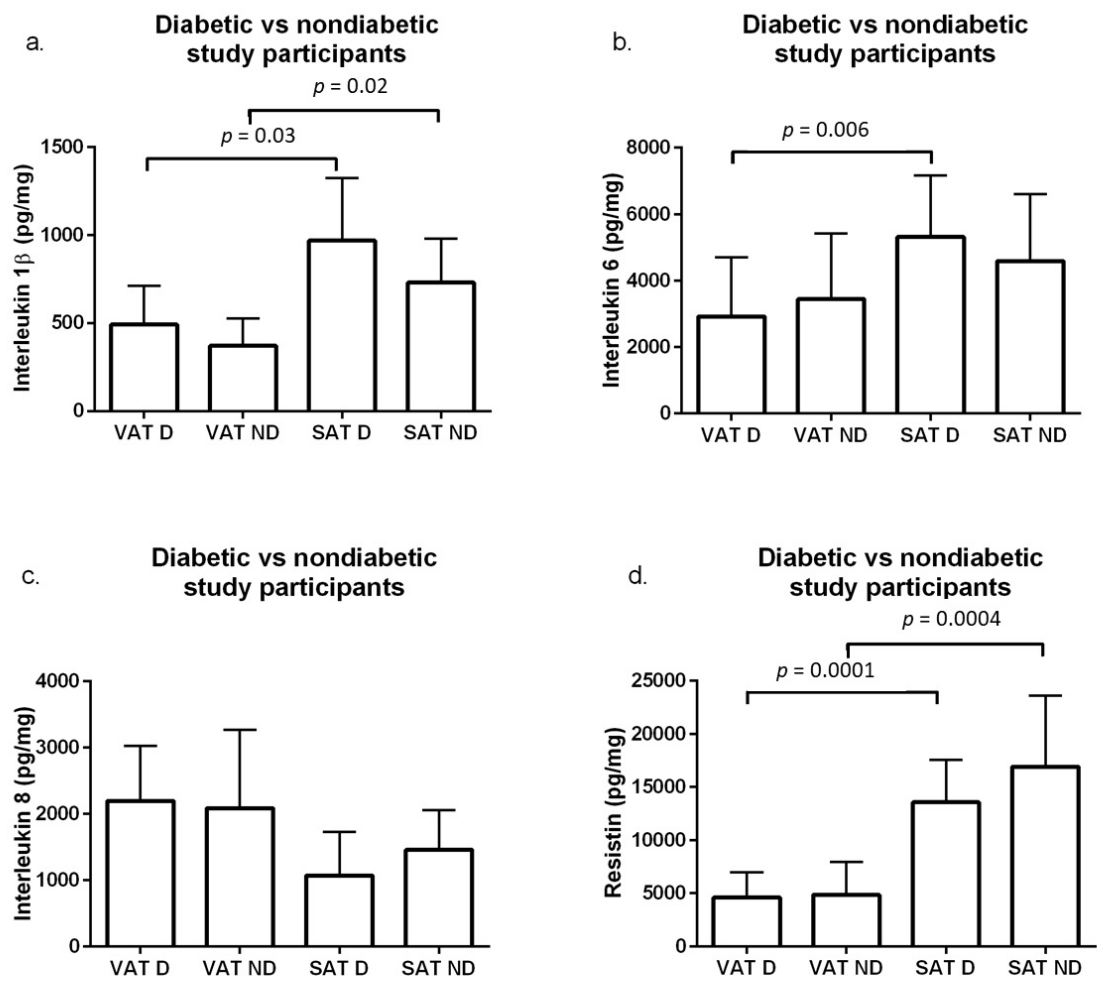

Supplement: s1 [file s1]
